# Supplementary material for: Non-invasive ventilation as a strategy for weaning from invasive mechanical ventilation: a systematic review and Bayesian meta-analysis
Source: Springer Nature journal article supplement (doi:10.1007/s00134-018-5434-z), 2018-10-31
Supplement: MOESM1 [file 16241290]

**Supplementary Material Contents**

Fig.5 Meta-analysis 30, 60 and 90 day mortality p2

Fig.6 Meta-analysis duration of ventilation p3

Fig.7 Meta-analysis Intensive care unit length of stay p4

Fig.8 Meta-analysis hospital length of stay p5

Fig.9 Meta-analysis weaning failure p6

Fig.7 Meta-analysis ventilator associated pneumonia p7

Fig.8 Sensitivity analysis – trials using spontaneous breathing trial p8

Table 2 Meta-analysis with different priors p9

Appendix A Sample search strategy p10

Appendix B #Bayesian meta-analysis code for hospital mortality outcome p12

Appendix C Datasets used in analysis p19

Fig. 5

#
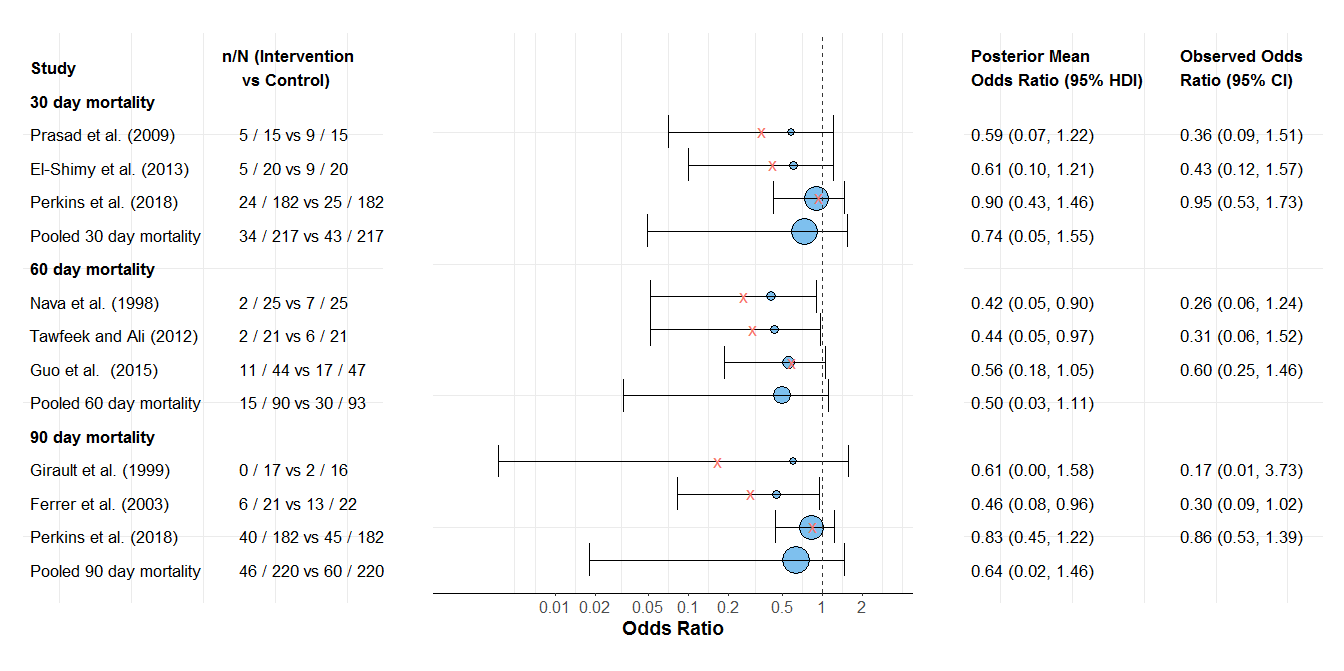


**Forest plot comparing 30, 60 and 90 day mortality rates for NIV and invasive weaning.** The estimated odds ratios (OR) from the posterior distribution for each study is shown as a circle, with 95% HDI represented by horizontal lines. The observed OR are given by crosses. The pooled OR (and 95% HDI) are also displayed as the last row for each outcome. An OR < 1 means that the intervention is superior.

Fig. 6


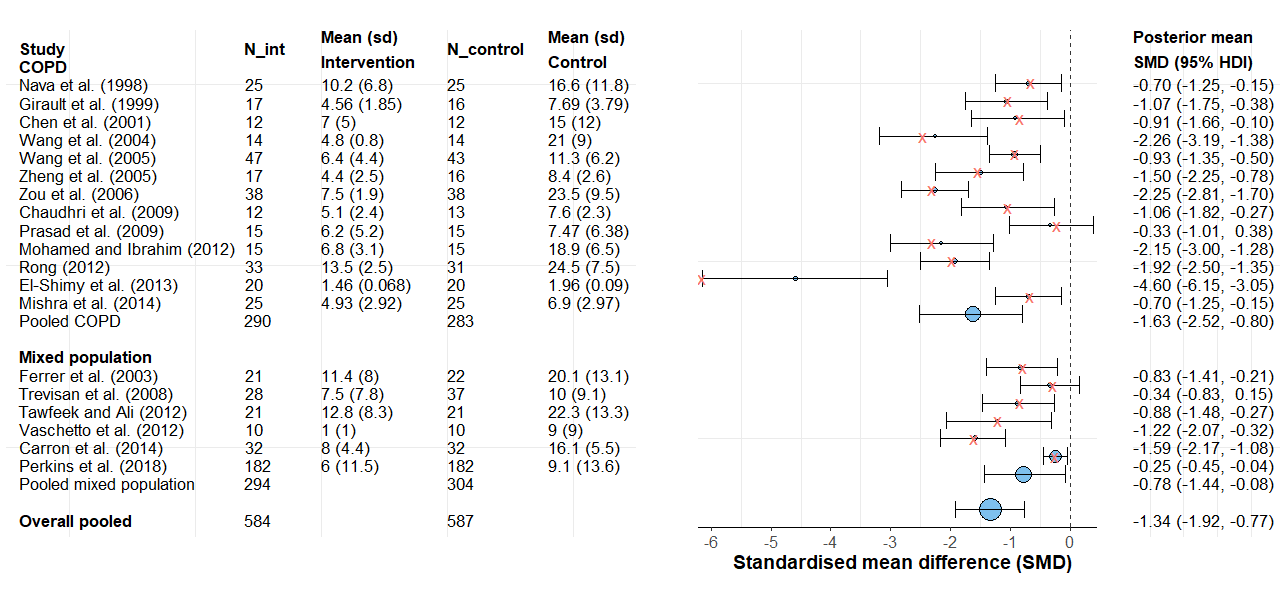


**Forest plot comparing duration of invasive ventilation for NIV and invasive weaning, by patient population (COPD vs mixed ICU population).** The estimated standardised mean difference (SMD) from the posterior distribution for each study is shown as a circle, with 95% HDI represented by horizontal lines. The observed SMD are given by crosses. The pooled estimates (and 95% HDI) are also displayed as the last row for each patient population, and the overall pooled estimate for all studies is displayed as the last row. A negative SMD corresponds to NIV having a shorter duration.

Fig. 7


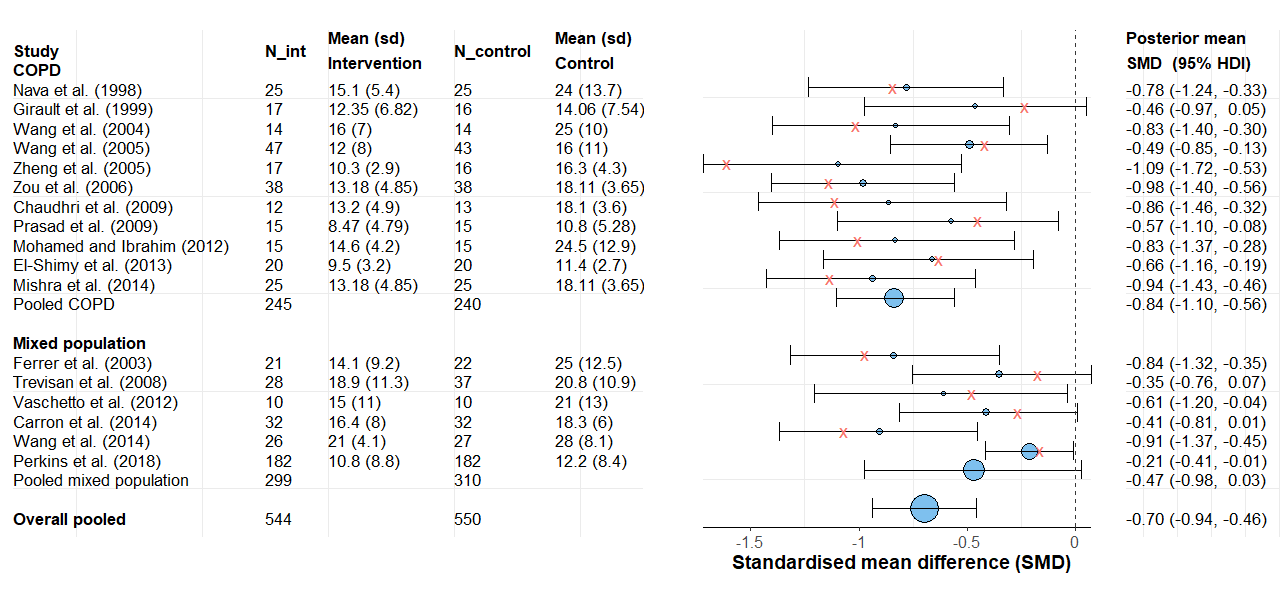


**Forest plot comparing intensive care unit length of stay (ICU LOS) for NIV and invasive weaning, by patient population (COPD vs mixed ICU population).** The estimated standardised mean difference (SMD) from the posterior distribution for each study is shown as a circle, with 95% HDI represented by horizontal lines. The observed SMD are given by crosses. The pooled estimates (and 95% HDI) are also displayed as the last row for each patient population, and the overall pooled estimate for all studies is displayed as the last row. A negative SMD corresponds to NIV having a shorter LOS.

Fig. 8


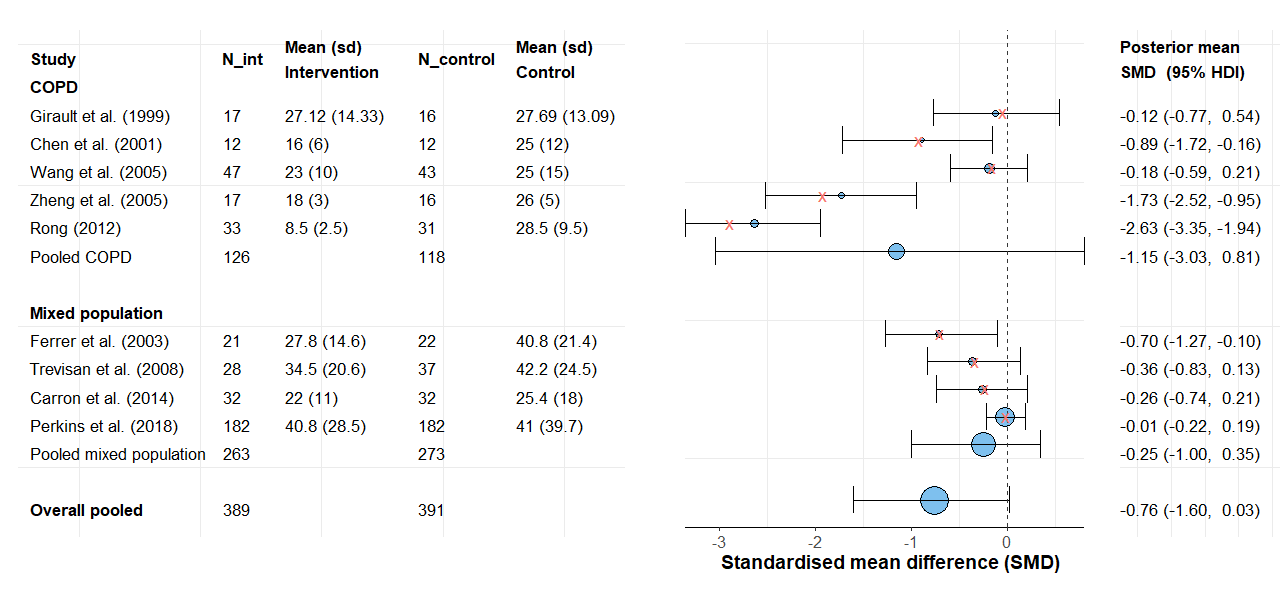


**Forest plot comparing hospital length of stay (LOS) for NIV and invasive weaning, by patient population (COPD vs mixed ICU population).** The estimated standardised mean difference (SMD) from the posterior distribution for each study is shown as a circle, with 95% HDI represented by horizontal lines. The observed SMD are given by crosses. The pooled estimates (and 95% HDI) are also displayed as the last row for each patient population, and the overall pooled estimate for all studies is displayed as the last row. A negative SMD corresponds to NIV having a shorter LOS.

Fig. 9

#
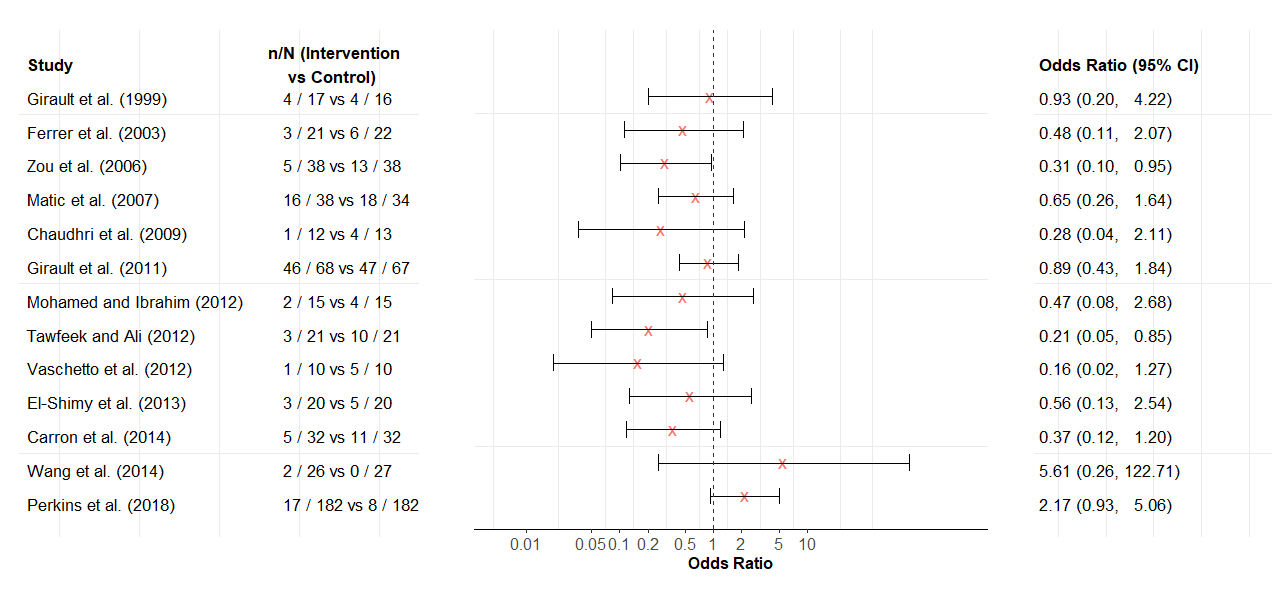


**Forest plot comparing weaning failure rates for NIV and invasive weaning.** The observed odds ratios (OR) for each study are given by crosses and 95% CI as horizontal lines. No meta-analysis was performed on these data due to study heterogeneity. An OR < 1 means that the intervention is superior.

Fig. 10


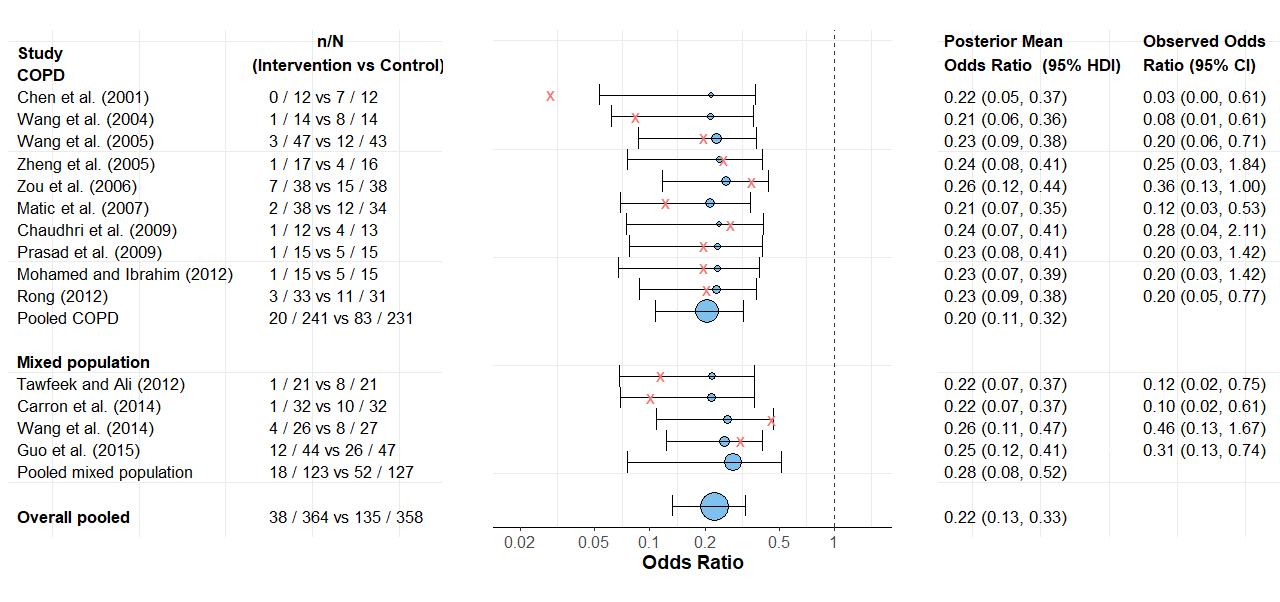


**Forest plot comparing ventilator-associated pneumonia (VAP) rates for NIV and invasive weaning, by patient population (COPD vs mixed ICU population).** The estimated odds ratios (OR) from the posterior distribution for each study is shown as a circle, with 95% HDI represented by horizontal lines. The observed OR are given by crosses. The pooled OR (and 95% HDI) are also displayed as the last row for each patient population, and the overall pooled estimate for all studies is displayed as the last row. An OR < 1 means that the intervention is superior.

Fig. 11


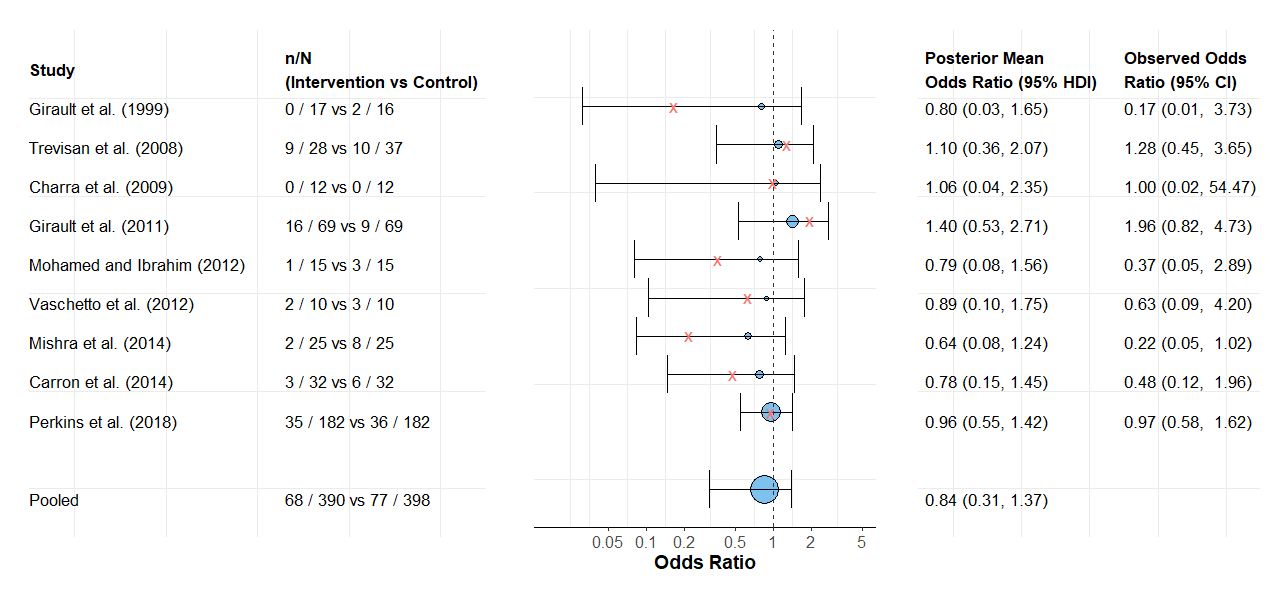


**Forest plot comparing hospital mortality rates for NIV and invasive weaning for patients in studies that used a failed spontaneous breathing trial (SBT) as a requirement for study entry (sensitivity analysis).** The estimated odds ratios (OR) from the posterior distribution for each study is shown as a circle, with 95% HDI represented by horizontal lines. The observed OR are given by crosses. The pooled OR (and 95% HDI) is also displayed as the last row. An OR < 1 means that the intervention is superior.

Table 2

| Prior* | Pooled OR estimate | Population variance estimate |
| --- | --- | --- |
|  |  |  |
| Hospital Mortality | | |
| τ~Unif(1/1000,10) | 0.58 (95% HDI: 0.29, 0.89) | 0.46 (95% HDI: 0.00, 1.24) |
| τ~Unif(1/1000,2) | 0.58 (95% HDI: 0.27, 0.89) | 0.45 (95% HDI: 0.00, 1.23) |
| 1/τ^2~gamma(0.0001, 0.0001) | 0.63 (95% HDI: 0.33, 0.91 ) | 0.24 (95% HDI: 0.00, 0.83) |
| 1/τ^2~gamma(0.001, 0.001) | 0.61 (95% HDI: 0.33, 0.91 ) | 0.27 (95% HDI: 0.00, 0.87 ) |
|  |  |  |
| 30 day mortality |  |  |
| τ~Unif(1/1000,2) | 0.74 (95% HDI: 0.05, 1.55) | 0.83 (95% HDI: 0.00, 3.05) |
| τ~Unif(1/1000,1) | 0.70 (95% HDI: 0.18, 1.29 ) | 0.30 (95% HDI: 0.00, 0.86) |
|  |  |  |
| 60 day mortality |  |  |
| τ~Unif(1/1000,2) | 0.50 (95% HDI: 0.03, 1.11) | 0.77 (95% HDI: 0.00, 3.00) |
| τ~Unif(1/1000,1) | 0.47 (95% HDI: 0.10, 0.92) | 0.27 (95% HDI: 0.00, 0.85) |
|  |  |  |
| 90 day mortality |  |  |
| τ~Unif(1/1000,2) | 0.64 (95% HDI: 0.02, 1.46) | 1.09 (95% HDI: 0.00, 3.36) |
| τ~Unif(1/1000,1) | 0.63 (95% HDI: 0.10, 1.19) | 0.36 (95% HDI: 0.00, 0.91) |
|  |  |  |
| VAP |  |  |
| τ~Unif(1/1000,10) | 0.22 (95% HDI: 0.13, 0.32 | 0.13 (95% HDI: 0.00, 0.48). |
| τ~Unif(1/1000,2) | 0.22 (95% HDI: 0.13, 0.33) | 0.13 (95% HDI: 0.00, 0.48 ) |
| 1/τ^2~gamma(0.0001, 0.0001) | 0.23 (95% HDI: 0.14, 0.32) | 0.04 (95% HDI: 0.00, 0.18 ) |
| 1/τ^2~gamma(0.001, 0.001) | 0.23 (95% HDI: 0.14, 0.32 ) | 0.06 (95% HDI: 0.00, 0.24) |
|  |  |  |
|  |  |  |
| Prior | **Pooled SMD estimate** | **Population variance estimate** |
|  |  |  |
| Duration Invasive ventilation |  |  |
| τ~Unif(1/1000,10) | -1.34 (95% HDI: -1.93, -0.80) | 1.39 (95% HDI: 0.40, 2.75). |
| τ~Unif(1/1000,2) | -1.34 (95% HDI: -1.92, -0.78) | 1.37 (95% HDI: 0.37, 2.64 ) |
| 1/τ^2~gamma(0.0001, 0.0001) | -1.34 (95% HDI: -1.87, -0.81) | 1.25 (95% HDI: 0.33, 2.42 ) |
| 1/τ^2~gamma(0.001, 0.001) | -1.34 (95% HDI: -1.87, -0.81) | 1.25 (95% HDI: 0.33, 2.42 ) |
|  |  |  |
| Hospital LOS |  |  |
| τ~Unif(1/1000,10) | -0.77 (95% HDI: -1.59, 0.00) | 1.39 (95% HDI: 0.20, 3.45) |
| τ~Unif(1/1000,2) | -0.77 (95% HDI: -1,55, 0.01 ) | 1.24 (95% HDI: 0.24, 2.86 ) |
| 1/τ^2~gamma(0.0001, 0.0001) | -0.77 (95% HDI: -1.54, -0.08) | 1.11 (95% HDI: 0.19, 2.59) |
| 1/τ^2~gamma(0.001, 0.001) | -0.77 (95% HDI: -1.53, -0.07) | 1.11 (95% HDI: 0.18, 2.59 ) |
|  |  |  |
| ICU LOS |  |  |
| τ~Unif(1/1000,10) | -0.70 (95% HDI: -0.94, -0.46) | 0.15 (95% HDI: 0.02, 0.32) |
| τ~Unif(1/1000,2) | -0.70 (95% HDI: -0.94, -0.46) | 0.15 (95% HDI: 0.02, 0.32 ) |
| 1/τ^2~gamma(0.0001, 0.0001) | -0.69 (95% HDI: -0.92, -0.47) | 0.12 (95% HDI: 0.01, 0.28 ) |
| 1/τ^2~gamma(0.001, 0.001) | -0.69 (95% HDI: -0.92, -0.48 ) | 0.12 (95% HDI: 0.01, 0.28 ) |

* τ is the population standard deviation; 1/τ^2 is the population precision

**Prior sensitivity analysis for population standard deviation and precision parameters**

Appendix A Sample search strategy

| 1. exp Positive-Pressure Respiration/ |
| --- |
| 2. exp Respiration, Artificial/ |
| 3. exp Ventilators, Mechanical/ |
| 4. mechanical ventilation.mp. |
| 5. exp Noninvasive Ventilation/ |
| 6. NIV.mp. [mp=title, abstract, original title, name of substance word, subject heading word, keyword heading word, protocol supplementary concept word, rare disease supplementary concept word, unique identifier, synonyms] |
| 7. NIPPV.mp. [mp=title, abstract, original title, name of substance word, subject heading word, keyword heading word, protocol supplementary concept word, rare disease supplementary concept word, unique identifier, synonyms] |
| 8. non-invasive.mp. [mp=title, abstract, original title, name of substance word, subject heading word, keyword heading word, protocol supplementary concept word, rare disease supplementary concept word, unique identifier, synonyms] |
| 9. exp Ventilator Weaning/ |
| 10. weaning.mp. [mp=title, abstract, original title, name of substance word, subject heading word, keyword heading word, protocol supplementary concept word, rare disease supplementary concept word, unique identifier, synonyms] |
| 11. exp Intubation, Intratracheal/ |
| 12. exp Airway Extubation/ |
| 13. extubation.mp. [mp=title, abstract, original title, name of substance word, subject heading word, keyword heading word, protocol supplementary concept word, rare disease supplementary concept word, unique identifier, synonyms] |
| 14. 1 or 2 or 3 or 4 or 11 |
| 15. 9 or 10 or 12 or 13 |
| 16. noninvasive.mp. [mp=title, abstract, original title, name of substance word, subject heading word, keyword heading word, protocol supplementary concept word, rare disease supplementary concept word, unique identifier, synonyms] |
| 17. 5 or 6 or 7 or 8 or 16 |
| 18. 14 and 15 and 17 |
| 19. randomized controlled trial.pt. |
| 20. controlled clinical trial.pt. |
| 21. randomized.ab. |
| 22. placebo.ab. |
| 23. randomly.ab. |
| 24. drug therapy.fs. |
| 25. trial.ab. |
| 26. groups.ab. |
| 27. exp animals/ not humans.sh. |
| 28. 19 or 20 or 21 or 22 or 23 or 24 or 25 or 26 |
| 29. 28 not 27 |
| 30. 18 and 29 |
| 31. invasive ventilation.mp. [mp=title, abstract, original title, name of substance word, subject heading word, keyword heading word, protocol supplementary concept word, rare disease supplementary concept word, unique identifier, synonyms] |
| 32. liberat*.mp. [mp=title, abstract, original title, name of substance word, subject heading word, keyword heading word, protocol supplementary concept word, rare disease supplementary concept word, unique identifier, synonyms] |
| 33. 1 or 2 or 3 or 4 or 11 or 31 |
| 34. 5 or 6 or 7 or 8 or 16 |
| 35. 9 or 10 or 12 or 13 or 32 |
| 36. 29 and 33 and 34 and 35 |

Appendix B #Bayesian meta-analysis code for hospital mortality outcome

remove(list=ls())

setwd("H:/BREATHE Bayesian meta analysis")#set working directory

#load required packages. make sure they're installed first

library(plyr)

library(scales)

library(ggplot2)

library(gridExtra)

library(grid)

require(rjags)

#SET UP THE JAGS MODEL

cat("model {

# Likelihood

for (j in 1:Nstud) {

P[j] <- 1/V[j] # Calculate precision for each study

Y[j] ~ dnorm(theta[j],P[j]) #data

theta[j] ~ dnorm(mu,prec)

or_study[j]<-exp(theta[j]) #OR for each study

}

# Priors

mu ~ dnorm(0,1.0E-6) #vague prior for population mean

prec <- 1/tau.sq

tau.sq <- tau*tau # tau.sq is between-study variance

tau ~ dunif(1/1000,10) # Uniform prior for between-study SD

OR<-exp(mu) #exponentiate to get back to OR scale - population mean

prob.OR1<-1-step(mu) #calc prob of OR < 1

d.new~dnorm(mu, prec) #treatment effect for a future study (on log OR scale)

OR.new<-exp(d.new) #predicted OR for future study

}", file="Breathe_hospmort_logOR.txt")

###################################################

#READ IN HOSPITAL MORTALITY DATA

dataset1 = read.csv("hospital mortality.csv")

#NOT ALL OF THE STUDIES HAVE THE HOSPITAL MORTALITY DATA, SO REMOVE STUDIES THAT DON'T

dataset<-dataset1[complete.cases(dataset1),]

dataset<-dataset[order(dataset$year),] #reorder studies from oldest to newest

#relabel variables

y11 = dataset$r_intervention #a - INTERVENTION ARM, DIED

y12 = dataset$N_intervention - dataset$r_intervention #b - INTERVENTION ARM, DIDN'T DIE

n1 = dataset$N_intervention # NUMBER IN INTERVENTION ARM

y21 = dataset$r_control #c - CONTROL ARM, DIED

y22 = dataset$N_control - dataset$r_control #d - CONTROL ARM, DIDN'T DIE

n2 = dataset$N_control # NUMBER IN CONTROL ARM

#counts are small, so add a small constant. Will also allow us to calc OR for 0 hospital mortality study (Recommended in Gelman BDA book)

y11=y11+0.5

y12=y12+0.5

y21=y21+0.5

y22 = y22+0.5

p1=y11/n1

p2=y21/n2

#now calculate the odds ratios for each study

OddR = (y11*y22)/(y12*y21)

#now calculate the log odds ratios, which are assumed to be normally distributed, and the variance of the log-OR (this is given in the Gelman BDA book)

logodds = log(OddR) #this is the data

v_logodds = 1/y11 + 1/y12 + 1/y21 + 1/y22 #variance of the log odds

Nstud<-dim(dataset)[1] #number of studies included in this meta-analysis

##########################################################################

#FORMAT THE DATA FOR JAGS

breatheDat<- list(Y=logodds,V=v_logodds,Nstud=Nstud) #DATA

breatheParams <- c("OR.new","mu","tau", "tau.sq", "OR", "prob.OR1", "theta", "or_study") #PARAMETERS TO SAVE

breatheInits<-function(){

list("theta"=rep(0,Nstud),"mu"=c(0),

"tau"=c(1))

} # INITIAL VALUES

##########################################################################

#now run the model in JAGS using R2jags

set.seed(100)

library(R2jags)

jag.breathe<-jags(data=breatheDat,

inits=breatheInits,

parameters.to.save=breatheParams, n.iter=50000,n.burnin=1000, n.thin=10, jags.seed = 100,

model.file="Breathe_hospmort_logOR.txt")

#check convergence

gelman.diag(as.mcmc(jag.breathe))

gelman.plot(as.mcmc(jag.breathe))

plot(as.mcmc(jag.breathe))

plot(jag.breathe)

#summary - obtain posterior means from output

jag.breathe

#obtain HDIs

library(HDInterval)

hdi(jag.breathe$BUGSoutput$sims.list$"tau.sq", credMass = 0.95)

hdi(jag.breathe$BUGSoutput$sims.list$"OR", credMass = 0.95)

######################################################

**#Bayesian meta-analysis code for duration of invasive ventilation**

remove(list=ls())

setwd("H:/BREATHE Bayesian meta analysis") #set working directory

#load required packages

require(rjags)

#SET UP THE JAGS MODEL

cat("model {

# Likelihood

for (j in 1:Nstud) {

P[j] <- 1/V[j] # Calculate precision for each study

Y[j] ~ dnorm(theta[j],P[j])#y is the standardised mean difference for each study

theta[j] ~ dnorm(mu,prec)

}

# Priors

mu ~ dnorm(0,1.0E-6)

prec <- 1/tau.sq

tau.sq <- tau*tau # tau.sq is the between-study variance

tau ~ dunif(1/1000,10)

}", file="Breathe_durinv.txt")

###############################################

#Next, we read in the data, and set up initial values and nodes to monitor

#READ IN DURATION INVASIVE VENTILATION DATA

dataset = read.csv("duration inv vent.csv")

names(dataset)

#NOT ALL OF THE STUDIES HAVE THE DATA, SO REMOVE STUDIES THAT DON'T

dataset<-dataset[complete.cases(dataset),]

dataset<-dataset[order(dataset$year),] #reorder from oldest to newest studies

studies=levels(dataset$Study.ID)[dataset$Study.ID]

#sample size for each group

n_int=dataset$n_intervention

n_control=dataset$n_control

n1=n_int

n2=n_control

totaln=n1+n2

#calculate pooled sd for hedges g

sdpooled = sqrt(((n1-1)*dataset$sd_intervention^2 + (n2-1)*dataset$sd_control^2)/(n1+n2-2))

#calc hedges g (standardised effect size) - correct for bias in small sample size

effs = (dataset$mean_intervention - dataset$mean_control)/(sdpooled)*(1-(3/(4*totaln-9)))

#need the Ns for each group to calculate se of effect size

#Hedges and Olkin (1985). Statistical Methods for Meta-Analysis. Orlando: Academic Press.

var_effs = (n1+n2)/(n1*n2)+effs^2/(2*(n1+n2)) #variance of the standardised effect size

Nstud<-dim(dataset)[1] #number of studies included in this meta-analysis

############################################################################

#FORMAT THE DATA FOR JAGS

breatheDat<- list(Y=effs,V=var_effs,Nstud=Nstud) #DATA

breatheParams <- c("mu","tau", "tau.sq", "theta") #PARAMETERS TO SAVE

breatheInits<-function(){

list("theta"=rep(0,Nstud),"mu"=c(0),

"tau"=c(1))

} # INITIAL VALUES

############################################################################

#now run the model in JAGS using R2jags

set.seed(100)

library(R2jags)

jag.breathe<-jags(data=breatheDat,

inits=breatheInits,

parameters.to.save=breatheParams, n.iter=50000,n.burnin=1000, n.thin=10, jags.seed = 100,

model.file="Breathe_durinv.txt")

#check convergence

gelman.diag(as.mcmc(jag.breathe))

gelman.plot(as.mcmc(jag.breathe))

plot(as.mcmc(jag.breathe))

plot(jag.breathe)

#obtain posterior mean from summary

jag.breathe

#obtain HDIs

library(HDInterval)

hdi(jag.breathe$BUGSoutput$sims.list$"tau.sq", credMass = 0.95)

hdi(jag.breathe$BUGSoutput$sims.list$"mu", credMass = 0.95)

Appendix C Datasets used in analysis

Hospital Mortality

| Study ID | year | r_intervention | N_intervention | r_control | N_control |
| --- | --- | --- | --- | --- | --- |
| Carron et al. (2014) | 2014 | 3 | 32 | 6 | 32 |
| Charra et al. (2009) | 2009 | 0 | 12 | 0 | 12 |
| Chaudhri et al. (2009) | 2009 |  |  |  |  |
| Chen et al. (2001) | 2001 | 0 | 12 | 3 | 12 |
| El-Shimy et al. (2013) | 2013 |  |  |  |  |
| Ferrer et al. (2003) | 2003 |  |  |  |  |
| Girault et al. (1999) | 1999 | 0 | 17 | 2 | 16 |
| Girault et al. (2011) | 2011 | 16 | 69 | 9 | 69 |
| Guo et al. (2015) | 2015 |  |  |  |  |
| Laiq et al. (2013) | 2013 |  |  |  |  |
| Mishra et al. (2014) | 2014 | 2 | 25 | 8 | 25 |
| Mohamed and Ibrahim (2012) | 2012 | 1 | 15 | 3 | 15 |
| Nava et al. (1998) | 1998 |  |  |  |  |
| Prasad et al. (2009) | 2009 |  |  |  |  |
| Tawfeek and Ali (2012) | 2012 |  |  |  |  |
| Trevisan et al. (2008) | 2008 | 9 | 28 | 10 | 37 |
| Vaschetto et al. (2012) | 2012 | 2 | 10 | 3 | 10 |
| Wang et al. (2005) | 2005 | 1 | 47 | 7 | 43 |
| Wang et al. (2014) | 2014 | 2 | 26 | 5 | 27 |
| Zou et al. (2006) | 2006 | 3 | 38 | 11 | 38 |
| Perkins et al. (2018) | 2018 | 35 | 182 | 36 | 182 |
| Wang et al. (2004) | 2004 | 1 | 14 | 2 | 14 |
| Zheng et al. (2005) | 2005 | 3 | 17 | 3 | 16 |
| Matic et al. (2007) | 2007 |  |  |  |  |
| Rong (2012) | 2012 | 2 | 33 | 8 | 31 |

30, 60, 90 day mortality

| Study ID | r_intervention | N_intervention | r_control | N_control | timepoint |
| --- | --- | --- | --- | --- | --- |
| Prasad et al. (2009) | 5 | 15 | 9 | 15 | 30 |
| El-Shimy et al. (2013) | 5 | 20 | 9 | 20 | 30 |
| Perkins et al. (2018) | 24 | 182 | 25 | 182 | 30 |
| Nava et al. (1998) | 2 | 25 | 7 | 25 | 60 |
| Tawfeek and Ali (2012) | 2 | 21 | 6 | 21 | 60 |
| Guo et al. (2015) | 11 | 44 | 17 | 47 | 60 |
| Girault et al. (1999) | 0 | 17 | 2 | 16 | 90 |
| Ferrer et al. (2003) | 6 | 21 | 13 | 22 | 90 |
| Perkins et al. (2018) | 40 | 182 | 45 | 182 | 90 |

Duration of ventilation

| Study ID | year | Intervention | Control | mean_intervention | sd_intervention | n_intervention | mean_control | sd_control | n_control |
| --- | --- | --- | --- | --- | --- | --- | --- | --- | --- |
| Carron et al. (2014) | 2014 | 8 (4.4) | 16.1 (5.5) | 8 | 4.4 | 32 | 16.1 | 5.5 | 32 |
| Charra et al. (2009) | 2009 |  |  |  |  |  |  |  |  |
| Chaudhri et al. (2009) | 2009 | 5.1(2.4) | 7.6 (2.3) | 5.1 | 2.4 | 12 | 7.6 | 2.3 | 13 |
| Chen et al. (2001) | 2001 | 7(5) | 15(12) | 7 | 5 | 12 | 15 | 12 | 12 |
| El-Shimy et al. (2013) | 2013 | 35 (1.63) hrs | 47 (2.25) hrs | 1.46 | 0.068 | 20 | 1.96 | 0.09 | 20 |
| Ferrer et al. (2003) | 2003 | 11.4 (8) | 20.1 (13.1) | 11.4 | 8 | 21 | 20.1 | 13.1 | 22 |
| Girault et al. (1999) | 1999 | 4.56 (1.85) | 7.69 (3.79) | 4.56 | 1.85 | 17 | 7.69 | 3.79 | 16 |
| Girault et al. (2011) | 2011 |  |  |  |  |  |  |  |  |
| Guo et al. (2015) | 2015 |  |  |  |  |  |  |  |  |
| Laiq et al. (2013) | 2013 |  |  |  |  |  |  |  |  |
| Mishra et al. (2014) | 2014 | 4.93 (2.92) | 6.9 (2.97) | 4.93 | 2.92 | 25 | 6.9 | 2.97 | 25 |
| Mohamed and Ibrahim (2012) | 2012 | 6.8 (3.1) | 18.9 (6.5) | 6.8 | 3.1 | 15 | 18.9 | 6.5 | 15 |
| Nava et al. (1998) | 1998 | 10.2 (6.8) | 16.6 (11.8) | 10.2 | 6.8 | 25 | 16.6 | 11.8 | 25 |
| Prasad et al. (2009) | 2009 | 6.20 (5.20) | 7.47 (6.38) | 6.2 | 5.2 | 15 | 7.47 | 6.38 | 15 |
| Tawfeek and Ali (2012) | 2012 | 12.8 (8.3) | 22.3(13.3) | 12.8 | 8.3 | 21 | 22.3 | 13.3 | 21 |
| Trevisan et al. (2008) | 2008 | 7.5 (7.8) | 10.0 (9.1) | 7.5 | 7.8 | 28 | 10 | 9.1 | 37 |
| Vaschetto et al. (2012) | 2012 | 1(1) | 9(9) | 1 | 1 | 10 | 9 | 9 | 10 |
| Wang et al. (2005) | 2005 | 6.4(4.4) | 11.3 (6.2) | 6.4 | 4.4 | 47 | 11.3 | 6.2 | 43 |
| Wang et al. (2014) | 2014 | 7.0 (6.8, 9.5) | 21.0 (17.0, 25.0) |  |  |  |  |  |  |
| Zou et al. (2006) | 2006 | 7.5 (1.9) | 23.5 (9.5) | 7.5 | 1.9 | 38 | 23.5 | 9.5 | 38 |
| Perkins et al. (2018) | 2018 | 6 (11.5) | 9.1 (13.6) | 6 | 11.5 | 182 | 9.1 | 13.6 | 182 |
| Wang et al. (2004) | 2004 | 4.8 (0.8) | 21 (9.0) | 4.8 | 0.8 | 14 | 21 | 9 | 14 |
| Zheng et al. (2005) | 2005 | 4.4 (2.5) | 8.4 (2.6) | 4.4 | 2.5 | 17 | 8.4 | 2.6 | 16 |
| Matic et al. (2007) | 2007 | Median 102 hours (min 68 Max 230, IQ range 26) | Median 187 hours (min 112 Max 446, IQ range 68) |  |  |  |  |  |  |
| Rong (2012) | 2012 | 13.5(2.5) | 24.5 (7.5) | 13.5 | 2.5 | 33 | 24.5 | 7.5 | 31 |

ICU Length of Stay

| Study ID | year | Intervention | Control | mean_intervention | sd_intervention | mean_control | sd_control | n_intervention | n_control |
| --- | --- | --- | --- | --- | --- | --- | --- | --- | --- |
| Carron et al. (2014) | 2014 | 16.4 (8) | 18.3 (6) | 16.4 | 8 | 18.3 | 6 | 32 | 32 |
| Charra et al. (2009) | 2009 |  |  |  |  |  |  |  |  |
| Chaudhri et al. (2009) | 2009 | 13.2 (4.9) | 18.1 (3.6) | 13.2 | 4.9 | 18.1 | 3.6 | 12 | 13 |
| Chen et al. (2001) | 2001 |  |  |  |  |  |  |  |  |
| El-Shimy et al. (2013) | 2013 | 9.5 (3.2) | 11.4 (2.7) | 9.5 | 3.2 | 11.4 | 2.7 | 20 | 20 |
| Ferrer et al. (2003) | 2003 | 14.1 (9.2) | 25 (12.5) | 14.1 | 9.2 | 25 | 12.5 | 21 | 22 |
| Girault et al. (1999) | 1999 | 12.35 (6.82) | 14.06 (7.54) | 12.35 | 6.82 | 14.06 | 7.54 | 17 | 16 |
| Girault et al. (2011) | 2011 | 7.5 (4.5, 15.5) | 7.5 (4.5, 14.5) |  |  |  |  |  |  |
| Guo et al. (2015) | 2015 |  |  |  |  |  |  |  |  |
| Laiq et al. (2013) | 2013 |  |  |  |  |  |  |  |  |
| Mishra et al. (2014) | 2014 | 13.18 (4.85) | 18.11 (3.65) | 13.18 | 4.85 | 18.11 | 3.65 | 25 | 25 |
| Mohamed and Ibrahim (2012) | 2012 | 14.6 (4.2) | 24.5 (12.9) | 14.6 | 4.2 | 24.5 | 12.9 | 15 | 15 |
| Nava et al. (1998) | 1998 | 15.1 (5.4) | 24.0(13.7) | 15.1 | 5.4 | 24 | 13.7 | 25 | 25 |
| Prasad et al. (2009) | 2009 | 8,47(4.79) | 10.80 (5.28) | 8.47 | 4.79 | 10.8 | 5.28 | 15 | 15 |
| Tawfeek and Ali (2012) | 2012 |  |  |  |  |  |  |  |  |
| Trevisan et al. (2008) | 2008 | 18.9 (11.3) | 20.8 (10.9) | 18.9 | 11.3 | 20.8 | 10.9 | 28 | 37 |
| Vaschetto et al. (2012) | 2012 | 15 (11) | 21(13) | 15 | 11 | 21 | 13 | 10 | 10 |
| Wang et al. (2005) | 2005 | 12(8) | 16(11) | 12 | 8 | 16 | 11 | 47 | 43 |
| Wang et al. (2014) | 2014 | 21(4.1) | 28(8.1) | 21 | 4.1 | 28 | 8.1 | 26 | 27 |
| Zou et al. (2006) | 2006 | 13.18(4.85) | 18.11(3.65) | 13.18 | 4.85 | 18.11 | 3.65 | 38 | 38 |
| Perkins et al. (2018) | 2018 | 10.8 (8.8) | 12.2 (8.4) | 10.8 | 8.8 | 12.2 | 8.4 | 182 | 182 |
| Wang et al. (2004) | 2004 | 16 (7) | 25 (10) | 16 | 7 | 25 | 10 | 14 | 14 |
| Zheng et al. (2005) | 2005 | 10.3 (2.9) | 16.3 (4.3) | 10.3 | 2.9 | 16.3 | 4.3 | 17 | 16 |
| Matic et al. (2007) | 2007 |  |  |  |  |  |  |  |  |
| Rong (2012) | 2012 |  |  |  |  |  |  |  |  |

Hospital Length of stay

| Study ID | year | Intervention | Control | mean_intervention | sd_intervention | mean_control | sd_control | n_intervention | n_control |
| --- | --- | --- | --- | --- | --- | --- | --- | --- | --- |
| Carron et al. (2014) | 2014 | 22 (11) | 25.4 (18) | 22 | 11 | 25.4 | 18 | 32 | 32 |
| Charra et al. (2009) | 2009 |  |  |  |  |  |  |  |  |
| Chaudhri et al. (2009) | 2009 |  |  |  |  |  |  |  |  |
| Chen et al. (2001) | 2001 | 16(6) | 25(12) | 16 | 6 | 25 | 12 | 12 | 12 |
| El-Shimy et al. (2013) | 2013 |  |  |  |  |  |  |  |  |
| Ferrer et al. (2003) | 2003 | 27.8 (14.6) | 40.8 (21.4) | 27.8 | 14.6 | 40.8 | 21.4 | 21 | 22 |
| Girault et al. (1999) | 1999 | 27.12 (14.33) | 27.69(13.09) | 27.12 | 14.33 | 27.69 | 13.09 | 17 | 16 |
| Girault et al. (2011) | 2011 | 17.5 (9.5, 28) | 18.5 (9.5, 28) |  |  |  |  |  |  |
| Guo et al. (2015) | 2015 |  |  |  |  |  |  |  |  |
| Laiq et al. (2013) | 2013 |  |  |  |  |  |  |  |  |
| Mishra et al. (2014) | 2014 |  |  |  |  |  |  |  |  |
| Mohamed and Ibrahim (2012) | 2012 |  |  |  |  |  |  |  |  |
| Nava et al. (1998) | 1998 |  |  |  |  |  |  |  |  |
| Prasad et al. (2009) | 2009 |  |  |  |  |  |  |  |  |
| Tawfeek and Ali (2012) | 2012 |  |  |  |  |  |  |  |  |
| Trevisan et al. (2008) | 2008 | 34.5(20.6) | 42.2(24.5) | 34.5 | 20.6 | 42.2 | 24.5 | 28 | 37 |
| Vaschetto et al. (2012) | 2012 |  |  |  |  |  |  |  |  |
| Wang et al. (2005) | 2005 | 23(10) | 25(15) | 23 | 10 | 25 | 15 | 47 | 43 |
| Wang et al. (2014) | 2014 |  |  |  |  |  |  |  |  |
| Zou et al. (2006) | 2006 |  |  |  |  |  |  |  |  |
| Perkins et al. (2018) | 2018 | 40.8 (28.5) | 41(39.7) | 40.8 | 28.5 | 41 | 39.7 | 182 | 182 |
| Wang et al. (2004) | 2004 |  |  |  |  |  |  |  |  |
| Zheng et al. (2005) | 2005 | 18 (3) | 26 (5) | 18 | 3 | 26 | 5 | 17 | 16 |
| Matic et al. (2007) | 2007 |  |  |  |  |  |  |  |  |
| Rong (2012) | 2012 | 8.5 (2.5) | 28.5 (9.5) | 8.5 | 2.5 | 28.5 | 9.5 | 33 | 31 |

Ventilator associated pneumonia

| Study ID | year | r_intervention | N_intervention | r_control | N_control |
| --- | --- | --- | --- | --- | --- |
| Carron et al. (2014) | 2014 | 1 | 32 | 10 | 32 |
| Charra et al. (2009) | 2009 |  |  |  |  |
| Chaudhri et al. (2009) | 2009 | 1 | 12 | 4 | 13 |
| Chen et al. (2001) | 2001 | 0 | 12 | 7 | 12 |
| El-Shimy et al. (2013) | 2013 |  |  |  |  |
| Ferrer et al. (2003) | 2003 |  |  |  |  |
| Girault et al. (1999) | 1999 |  |  |  |  |
| Girault et al. (2011) | 2011 |  |  |  |  |
| Guo et al. (2015) | 2015 | 12 | 44 | 26 | 47 |
| Laiq et al. (2013) | 2013 |  |  |  |  |
| Mishra et al. (2014) | 2014 |  |  |  |  |
| Mohamed and Ibrahim (2012) | 2012 | 1 | 15 | 5 | 15 |
| Nava et al. (1998) | 1998 |  |  |  |  |
| Prasad et al. (2009) | 2009 | 1 | 15 | 5 | 15 |
| Tawfeek and Ali (2012) | 2012 | 1 | 21 | 8 | 21 |
| Trevisan et al. (2008) | 2008 |  |  |  |  |
| Vaschetto et al. (2012) | 2012 |  |  |  |  |
| Wang et al. (2005) | 2005 | 3 | 47 | 12 | 43 |
| Wang et al. (2014) | 2014 | 4 | 26 | 8 | 27 |
| Zou et al. (2006) | 2006 | 7 | 38 | 15 | 38 |
| Perkins et al. (2018) | 2018 |  |  |  |  |
| Wang et al. (2004) | 2004 | 1 | 14 | 8 | 14 |
| Zheng et al. (2005) | 2005 | 1 | 17 | 4 | 16 |
| Matic et al. (2007) | 2007 | 2 | 38 | 12 | 34 |
| Rong (2012) | 2012 | 3 | 33 | 11 | 31 |

Weaning Failure

| Study ID | year | r_intervention | N_intervention | r_control | N_control |
| --- | --- | --- | --- | --- | --- |
| Carron et al. (2014) | 2014 | 5 | 32 | 11 | 32 |
| Charra et al. (2009) | 2009 |  |  |  |  |
| Chaudhri et al. (2009) | 2009 | 1 | 12 | 4 | 13 |
| Chen et al. (2001) | 2001 |  |  |  |  |
| El-Shimy et al. (2013) | 2013 | 3 | 20 | 5 | 20 |
| Ferrer et al. (2003) | 2003 | 3 | 21 | 6 | 22 |
| Girault et al. (1999) | 1999 | 4 | 17 | 4 | 16 |
| Girault et al. (2011) | 2011 | 46 | 68 | 47 | 67 |
| Guo et al. (2015) | 2015 |  |  |  |  |
| Laiq et al. (2013) | 2013 |  |  |  |  |
| Mishra et al. (2014) | 2014 |  |  |  |  |
| Mohamed and Ibrahim (2012) | 2012 | 2 | 15 | 4 | 15 |
| Nava et al. (1998) | 1998 |  |  |  |  |
| Prasad et al. (2009) | 2009 |  |  |  |  |
| Tawfeek and Ali (2012) | 2012 | 3 | 21 | 10 | 21 |
| Trevisan et al. (2008) | 2008 | 6 | 28 |  |  |
| Vaschetto et al. (2012) | 2012 | 1 | 10 | 5 | 10 |
| Wang et al. (2005) | 2005 |  |  |  |  |
| Wang et al. (2014) | 2014 | 2 | 26 | 0 | 27 |
| Zou et al. (2006) | 2006 | 5 | 38 | 13 | 38 |
| Perkins et al. (2018) | 2018 | 17 | 182 | 8 | 182 |
| Wang et al. (2004) | 2004 |  |  |  |  |
| Zheng et al. (2005) | 2005 |  |  |  |  |
| Matic et al. (2007) | 2007 | 16 | 38 | 18 | 34 |
| Rong (2012) | 2012 |  |  |  |  |
